# Supplementary material for: Ayahuasca and Dimethyltryptamine Adverse Events and Toxicity Analysis: A Systematic Thematic Review
Source: PubMed Central journal article supplement — Int J Toxicol. 2024 Feb 16;43(3):327–39. doi: 10.1177/10915818241230916 (PMC11088222; doi:10.1177/10915818241230916), 2024-02-16
Supplement: sj-pdf-1-ijt-10.1177_10915818241230916.pdf [file sj-pdf-1-ijt-10.1177_10915818241230916.pdf]

## Supplementary Information – Search Terms

| Database | Search Term                                                                                                                                                                                                                                                                                                                                                                                                                                                                                                                                                                                                                                                                                                                                                                                                                                                                                                                               |
|----------|-------------------------------------------------------------------------------------------------------------------------------------------------------------------------------------------------------------------------------------------------------------------------------------------------------------------------------------------------------------------------------------------------------------------------------------------------------------------------------------------------------------------------------------------------------------------------------------------------------------------------------------------------------------------------------------------------------------------------------------------------------------------------------------------------------------------------------------------------------------------------------------------------------------------------------------------|
| PubMed   | <p>           ("N,N-Dimethyltryptamine"[Mesh] OR "N,N-Dimethyltryptamine"[tiab] OR<br/>           NNdimethyltryptamine[tiab] OR Ayahuasca[tiab] OR dimethyltryptamine[tiab] OR<br/>           DMT[tiab] OR D.M.T[tiab] OR Aya[tiab] OR Ayahuasca vine[tiab] OR Sacred vine[tiab]<br/>           OR "Banisteriopsis caapi"[tiab] OR "Psychotria viridis"[tiab] OR DMT alkaloids[tiab])         </p> <p><b>NOT</b></p> <p><b>(disease-modifying therapies OR disease modifying ther*)</b></p> <p><b>AND</b></p> <p>(Adverse event OR AE OR toxicity OR toxicology OR safety OR side-effect OR<br/>           pharmacovigilance OR psychosis OR pregnancy OR mutagenicity OR "patient<br/>           experience*" OR "participant experience*" OR "subjective experience*" OR "Case<br/>           Reports" [Publication Type] OR "case report*" OR "case-stud*" OR "case histor*")</p> <p><b>AND</b></p> <p>(1900/1/1:2023/12/12[pdat])</p> |
| PsycINFO | <p>           Title: ("N,N-Dimethyltryptamine" OR "N,N-Dimethyltryptamine" OR<br/>           NNdimethyltryptamine OR Ayahuasca OR dimethyltryptamine OR DMT OR D.M.T OR<br/>           Aya OR Ayahuasca vine OR Sacred vine OR "Banisteriopsis caapi" OR "Psychotria<br/>           viridis" OR DMT alkaloids)         </p> <p><b>OR</b></p> <p>           Abstract: ("N,N-Dimethyltryptamine" OR "N,N-Dimethyltryptamine" OR<br/>           NNdimethyltryptamine OR Ayahuasca OR dimethyltryptamine OR DMT OR D.M.T OR<br/>           Aya OR Ayahuasca vine OR Sacred vine OR "Banisteriopsis caapi" OR "Psychotria<br/>           viridis" OR DMT alkaloids)         </p>                                                                                                                                                                                                                                                               |

| Database                  | Search Term                                                                                                                                                                                                                                                                                                                                                                                                                                                                                                                                                                                                                                                                                                                                                                                                                                                                                                                                                                                                                                                                                                                                                                                                                                                                                                                                                                                                                                                                                                                                                                                                                                                                                                                                                                                 |
|---------------------------|---------------------------------------------------------------------------------------------------------------------------------------------------------------------------------------------------------------------------------------------------------------------------------------------------------------------------------------------------------------------------------------------------------------------------------------------------------------------------------------------------------------------------------------------------------------------------------------------------------------------------------------------------------------------------------------------------------------------------------------------------------------------------------------------------------------------------------------------------------------------------------------------------------------------------------------------------------------------------------------------------------------------------------------------------------------------------------------------------------------------------------------------------------------------------------------------------------------------------------------------------------------------------------------------------------------------------------------------------------------------------------------------------------------------------------------------------------------------------------------------------------------------------------------------------------------------------------------------------------------------------------------------------------------------------------------------------------------------------------------------------------------------------------------------|
|                           | <p><b>NOT</b></p> <p><b>(disease-modifying therapies OR disease modifying ther*)</b></p> <p><b>AND</b></p> <p>(Adverse event OR AE OR toxicity OR toxicology OR safety OR side-effect OR pharmacovigilance OR psychosis OR pregnancy OR mutagenicity OR “patient experience*” OR “participant experience*” OR “subjective experience*” OR “case report*” OR “case-stud*” OR “case histor*”)</p>                                                                                                                                                                                                                                                                                                                                                                                                                                                                                                                                                                                                                                                                                                                                                                                                                                                                                                                                                                                                                                                                                                                                                                                                                                                                                                                                                                                             |
| <b>Clinicaltrials.gov</b> | <p>ayahuasca OR DMT OR N,N-Dimethyltryptamine OR Dimethyltryptamine</p> <p><b>FILTERS:</b></p> <p><b>HAS RESULTS</b></p>                                                                                                                                                                                                                                                                                                                                                                                                                                                                                                                                                                                                                                                                                                                                                                                                                                                                                                                                                                                                                                                                                                                                                                                                                                                                                                                                                                                                                                                                                                                                                                                                                                                                    |
| <b>Embase</b>             | <p>(title AND ('n,n-dimethyltryptamine'/exp OR 'n,n-dimethyltryptamine' OR nndimethyltryptamine OR 'ayahuasca'/exp OR ayahuasca OR 'dimethyltryptamine'/exp OR dimethyltryptamine OR dmt OR aya OR 'ayahuasca vine'/exp OR 'ayahuasca vine' OR (('ayahuasca'/exp OR ayahuasca) AND 'sacred vine' OR (sacred AND vine) OR 'banisteriopsis caapi'/exp OR 'banisteriopsis caapi' OR 'psychotria viridis'/exp OR 'psychotria viridis' OR 'dmt alkaloids' OR (dmt AND ('alkaloids'/exp OR alkaloids) OR 'abstract'/exp OR abstract) AND ('n,n-dimethyltryptamine'/exp OR 'n,n-dimethyltryptamine' OR nndimethyltryptamine OR 'ayahuasca'/exp OR ayahuasca OR 'dimethyltryptamine'/exp OR dimethyltryptamine OR dmt OR d.m.t OR aya OR 'ayahuasca vine'/exp OR 'ayahuasca vine' OR (('ayahuasca'/exp OR ayahuasca) AND vine) OR 'sacred vine' OR (sacred AND vine) OR 'banisteriopsis caapi'/exp OR 'banisteriopsis caapi' OR 'psychotria viridis'/exp OR 'psychotria viridis' OR 'dmt alkaloids' OR (dmt AND ('alkaloids'/exp OR alkaloids)))) NOT ('disease-modifying therapies' OR ('disease modifying therapies') OR 'disease modifying' OR (('disease'/exp OR disease) AND modifying AND therapies) OR ('adverse event'/exp OR 'adverse event' OR (adverse AND event) OR ae OR 'toxicity'/exp OR 'toxicology'/exp OR toxicology OR 'safety'/exp OR safety OR 'side effect'/exp OR 'side effect' OR 'pharmacovigilance'/exp OR pharmacovigilance OR 'psychosis'/exp OR psychosis OR 'pregnancy'/exp OR pregnancy OR 'mutagenicity'/exp OR mutagenicity OR 'patient experience*' OR 'participant experience*' OR 'subjective experience*' OR 'case report*' OR 'case-study*' OR 'case history*') AND [english]/limit:1</p> <p><b>FILTERS:</b></p> <p><b>Articles</b></p> <p><b>Reviews</b></p> |

| Database              | Search Term                                                                                                                                                                                                                                                                                                                                                                                                                                                                                                                                                                                                                                                                                                                                                                                                                                                                                                                                                                                                                                              |
|-----------------------|----------------------------------------------------------------------------------------------------------------------------------------------------------------------------------------------------------------------------------------------------------------------------------------------------------------------------------------------------------------------------------------------------------------------------------------------------------------------------------------------------------------------------------------------------------------------------------------------------------------------------------------------------------------------------------------------------------------------------------------------------------------------------------------------------------------------------------------------------------------------------------------------------------------------------------------------------------------------------------------------------------------------------------------------------------|
| <b>Web of Science</b> | <p>Title: "N,N-Dimethyltryptamine" OR "N,N-Dimethyltryptamine" OR NNdimethyltryptamine OR Ayahuasca OR dimethyltryptamine OR DMT OR D.M.T OR Aya OR Ayahuasca vine OR Sacred vine OR "Banisteriopsis caapi" OR "Psychotria viridis" OR "DMT alkaloids"</p> <p>Abstract: "N,N-Dimethyltryptamine" OR "N,N-Dimethyltryptamine" OR NNdimethyltryptamine OR Ayahuasca OR dimethyltryptamine OR DMT OR D.M.T OR Aya OR Ayahuasca vine OR Sacred vine OR "Banisteriopsis caapi" OR "Psychotria viridis" OR "DMT alkaloids"</p> <p>NOT</p> <p>("disease-modifying therapies" OR "disease modifying ther*" OR "disease modifying t**")</p> <p>AND</p> <p>(Adverse event OR AE OR toxicity OR toxicology OR safety OR side-effect OR pharmacovigilance OR psychosis OR pregnancy OR mutagenicity OR "patient experience*" OR "participant experience*" OR "subjective experience*" OR "Case Reports" OR "case report*" OR "case-stud*" OR "case histor**")</p> <p><b>FILTERS:</b></p> <p><b>ARTICLES, REVIEW ARTICLES, EARLY ACCESS</b></p> <p><b>ENGLISH</b></p> |
